# Supplementary material
Source: publisher figshare collection journal article supplement (https://acs.figshare.com/ndownloader/files/5065954)
Supplement: Supplementary file 1 [file 5065954]

*Supporting information for*

Absence of Substrate Channeling between  
Active Sites in the *Agrobacterium tumefaciens*  
IspDF and IspE Enzymes of the Methyl  
Erythritol Phosphate Pathway<sup>†</sup>

*Christian Lherbet<sup>†</sup>, Florence Pojer<sup>§</sup>, Stéphane B. Richard<sup>§</sup>, Joseph P. Noel<sup>§</sup> and C. D.  
Poulter<sup>†\*</sup>*

<sup>†</sup>Department of Chemistry, University of Utah, Salt Lake City, Utah 84112

<sup>§</sup>Jack Skirball Chemical Biology and Proteomics Laboratory, The Salk Institute for  
Biological Studies, La Jolla, CA 92037

poulter@chem.utah.edu

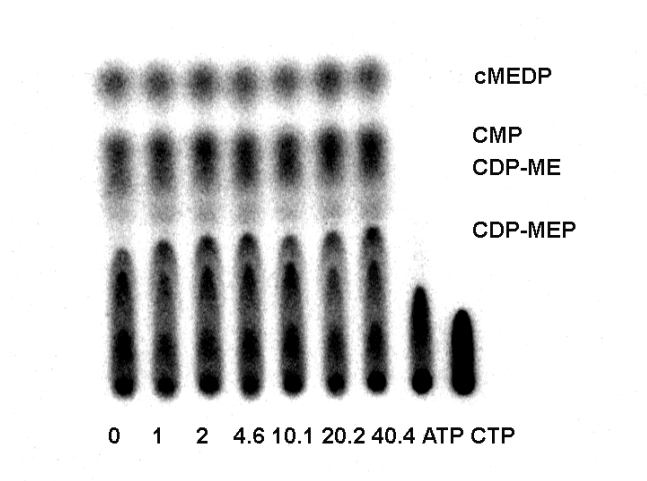

**Figure SI1** : TLC plate showing the formation of CDP-ME, CDP-MEP, CMP, cMEDP catalyzed by IspDF (0.24  $\mu$ M), IspE (0.31  $\mu$ M) in presence of different concentrations of IspE(D152A) after 15 min reaction at 37°C. ATP and CTP lanes represent the chemical reaction without enzyme.

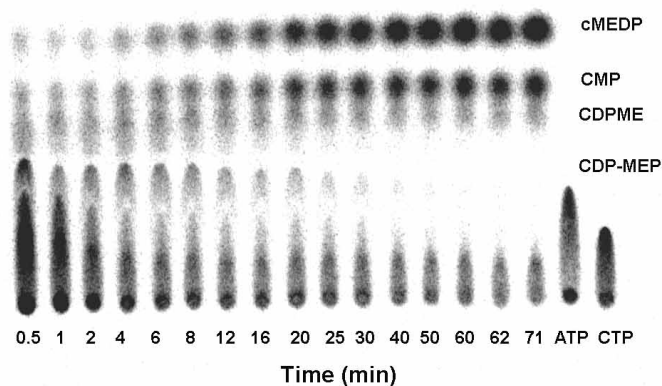

**Figure SI2** : TLC plate showing the time course for the formation of CDP-ME, CDP-MEP, CMP, cMEDP catalyzed by IspDF (0.24  $\mu$ M), IspE (3.12  $\mu$ M). At 61 min an additional 0.5  $\mu$ g portion of each enzyme were added. ATP and CTP lanes represent the chemical reaction without enzyme.

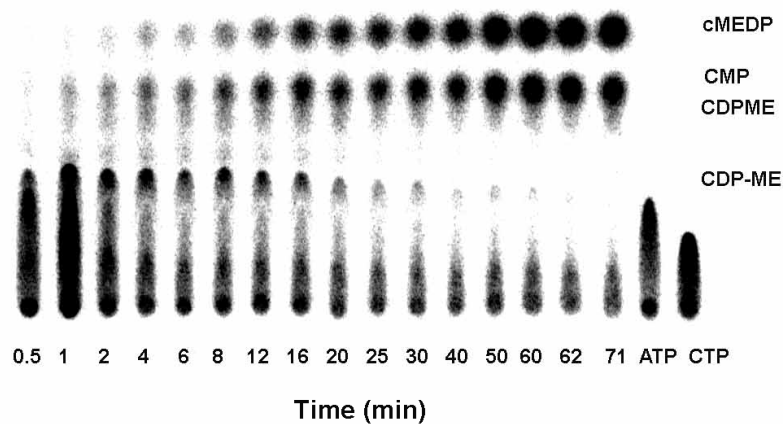

**Figure SI3** : TLC plate showing the time course for the formation of CDP-ME, CDP-MEP, CMP, cMEDP catalyzed by IspDF (0.24  $\mu$ M), IspE (3.12  $\mu$ M) and IspE(D152A)

(31.2  $\mu\text{M}$ ). At 61 min an additional 0.5  $\mu\text{g}$  portion of each enzyme were added. ATP and CTP lanes represent the chemical reaction without enzyme.

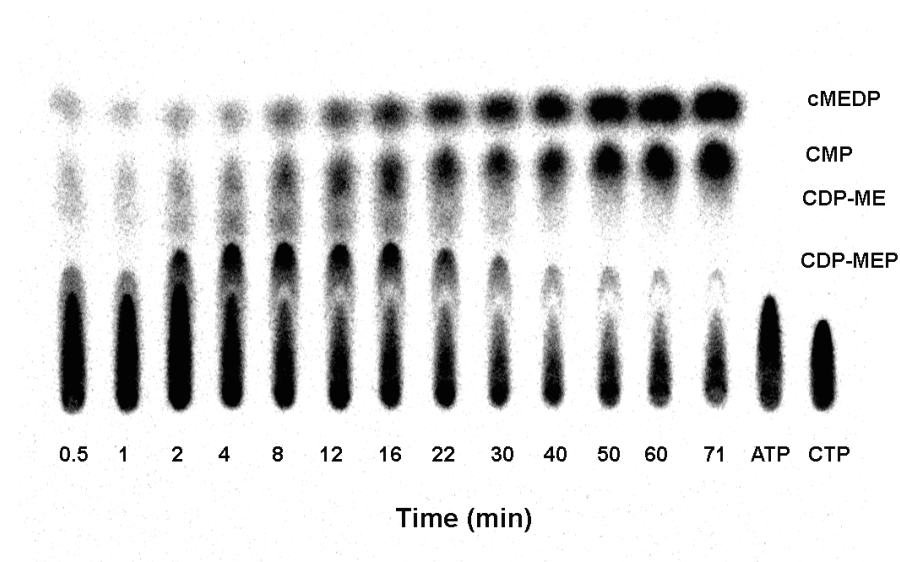

**Figure SI4 :** TLC plate showing the time course for the formation of CDP-ME, CDP-MEP, CMP, cMEDP catalyzed by IspDF (0.24  $\mu\text{M}$ ), IspE (3.12  $\mu\text{M}$ ) in presence of 30% glycerol. At 61 min an additional 0.5  $\mu\text{g}$  portion of each enzyme were added. ATP and CTP lanes represent the chemical reaction without enzyme.

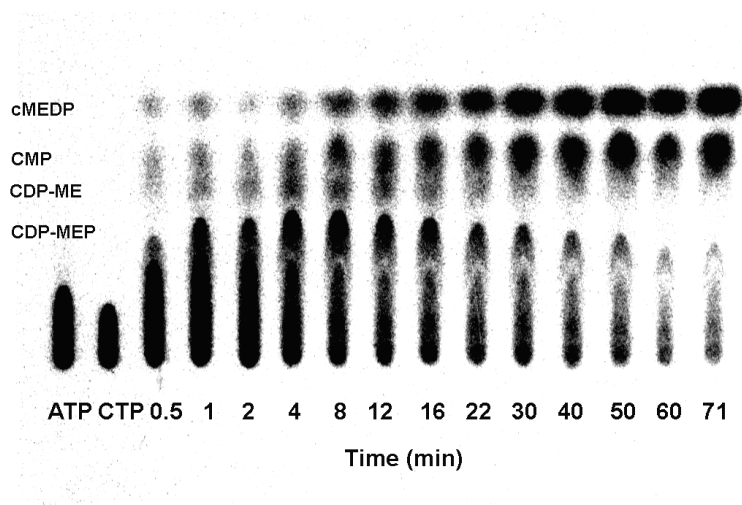

**Figure SI5 :** TLC plate showing the time course for the formation of CDP-ME, CDP-MEP, CMP, cMEDP catalyzed by IspDF (0.24  $\mu$ M), IspE (3.12  $\mu$ M) and IspE(D152A) (31.2  $\mu$ M) in presence of 30% glycerol. At 61 min an additional 0.5  $\mu$ g portion of each enzyme were added. ATP and CTP lanes represent the chemical reaction without enzyme.

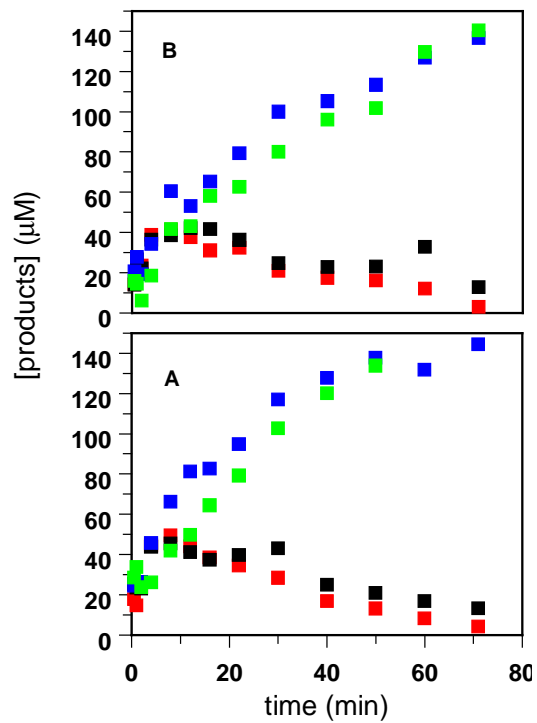

**Figure SI6 :** Time courses for the formation of CDP-ME(■), CDP-MEP (■), CMP (■), cMEDP (■) in presence of 30% glycerol. Panel A : IspDF (0.24  $\mu\text{M}$ ) and IspE (3.12  $\mu\text{M}$ ); Panel B : IspDF (0.24  $\mu\text{M}$ ), IspE (3.12  $\mu\text{M}$ ), IspE(D152A) (31.2  $\mu\text{M}$ ).

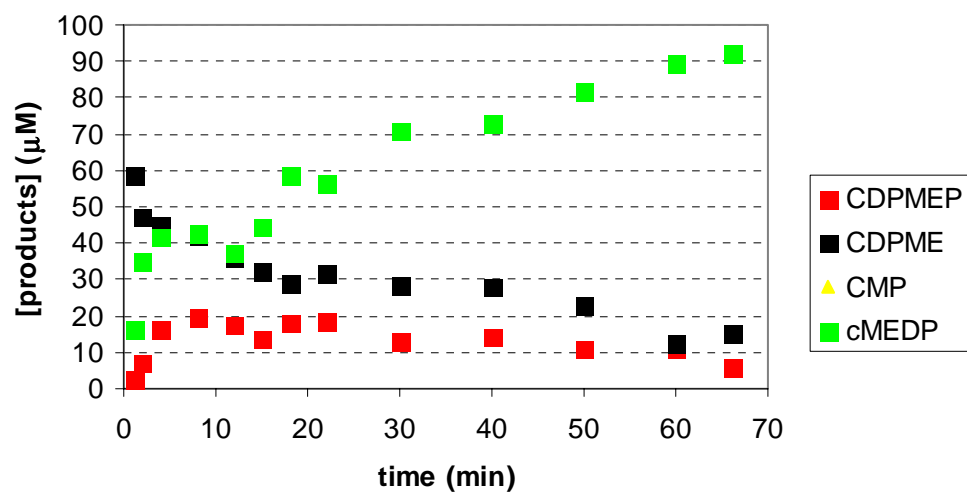

**Figure SI6 :** Time courses for the formation of CDP-ME, CDP-MEP, CMP, cMEDP catalyzed by IspDF (0.24  $\mu\text{M}$ ), IspE (3.12  $\mu\text{M}$ ) and IspE(D152A) (30.3  $\mu\text{M}$ ) in presence of 30% (v/v) glycerol.
